# Supplementary material for: Niosomes Functionalized with a Synthetic Carbohydrate Binding Agent for Mannose-Targeted Doxorubicin Delivery
Source: MDPI journal article supplement (doi:10.3390/pharmaceutics15010235), 2023-01-10
Supplement: s1 [file s1]

# Supplementary Materials

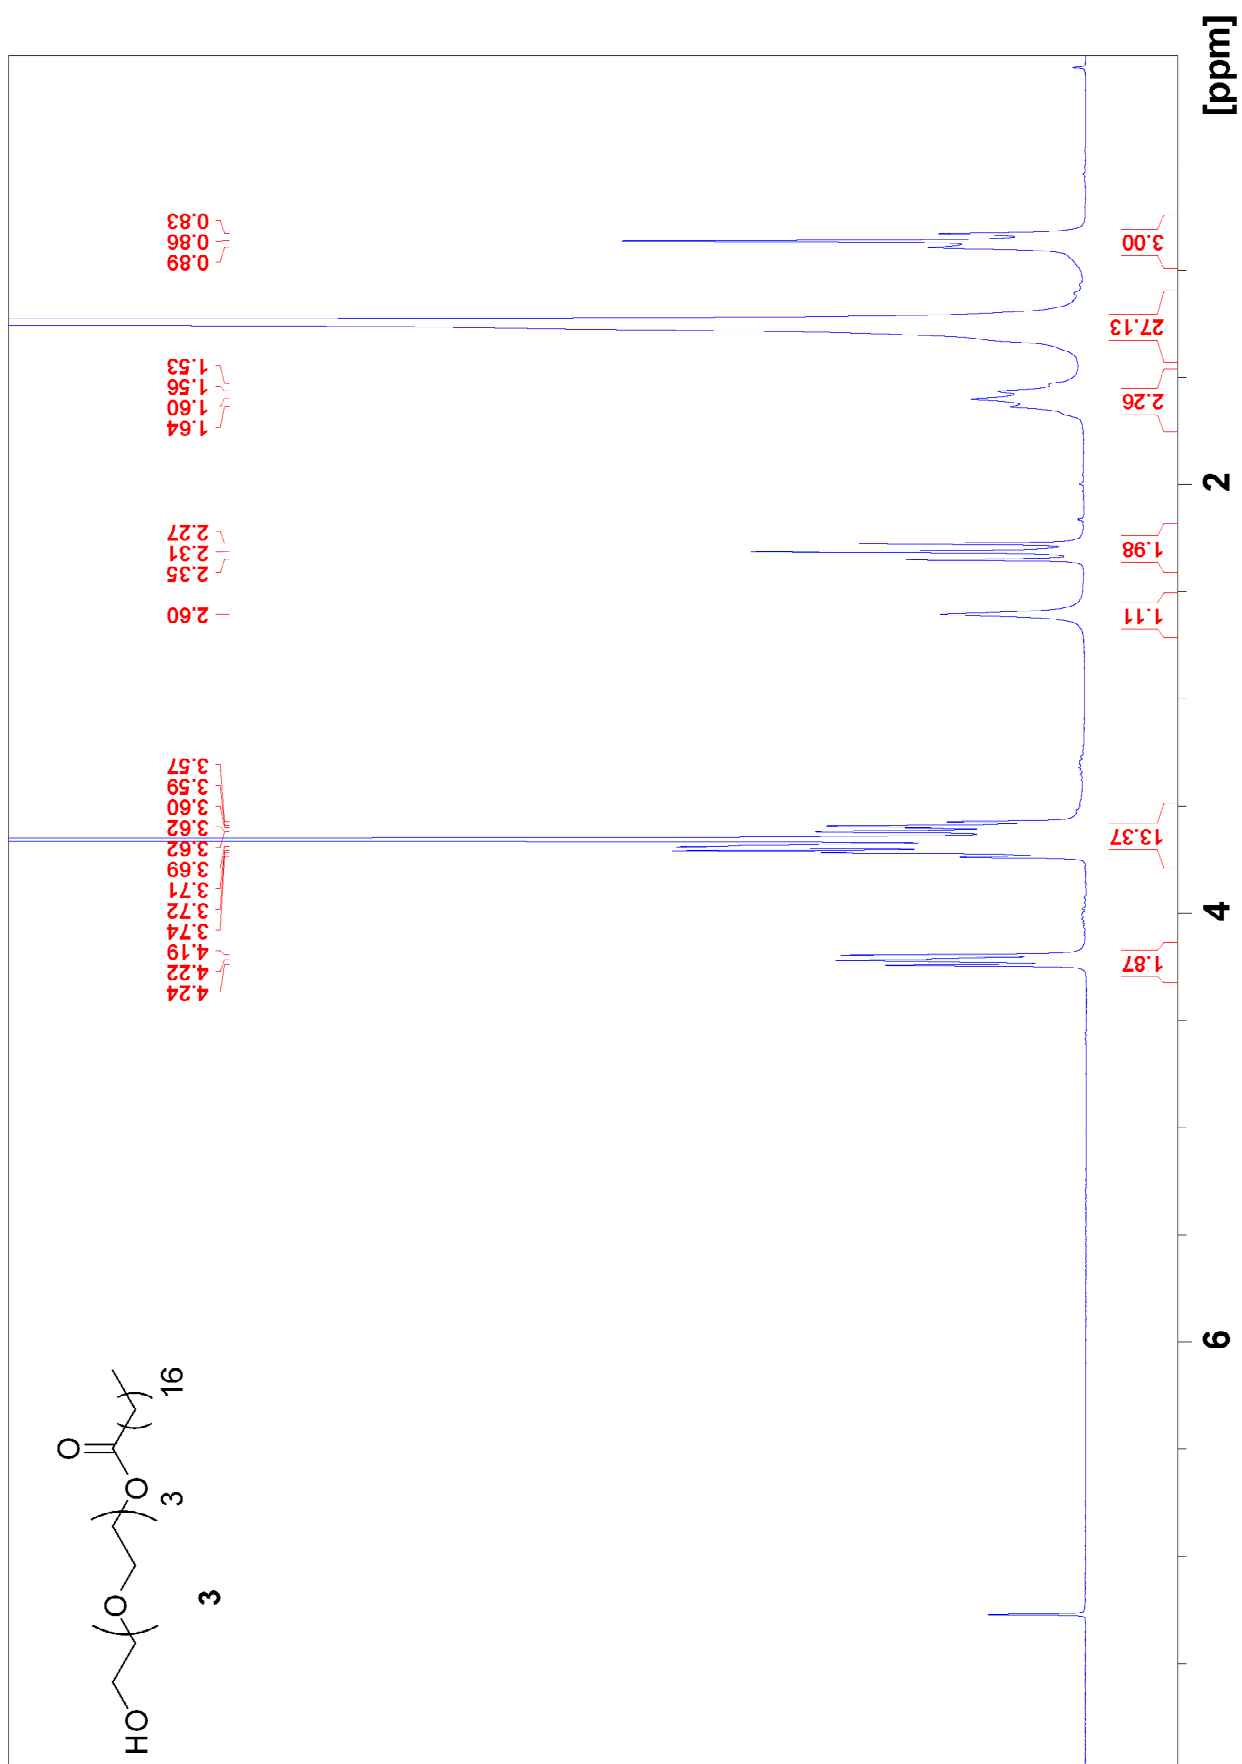

**Figure S1.** <sup>1</sup>H NMR spectrum of compound **3** (200 MHz, CDCl<sub>3</sub>).





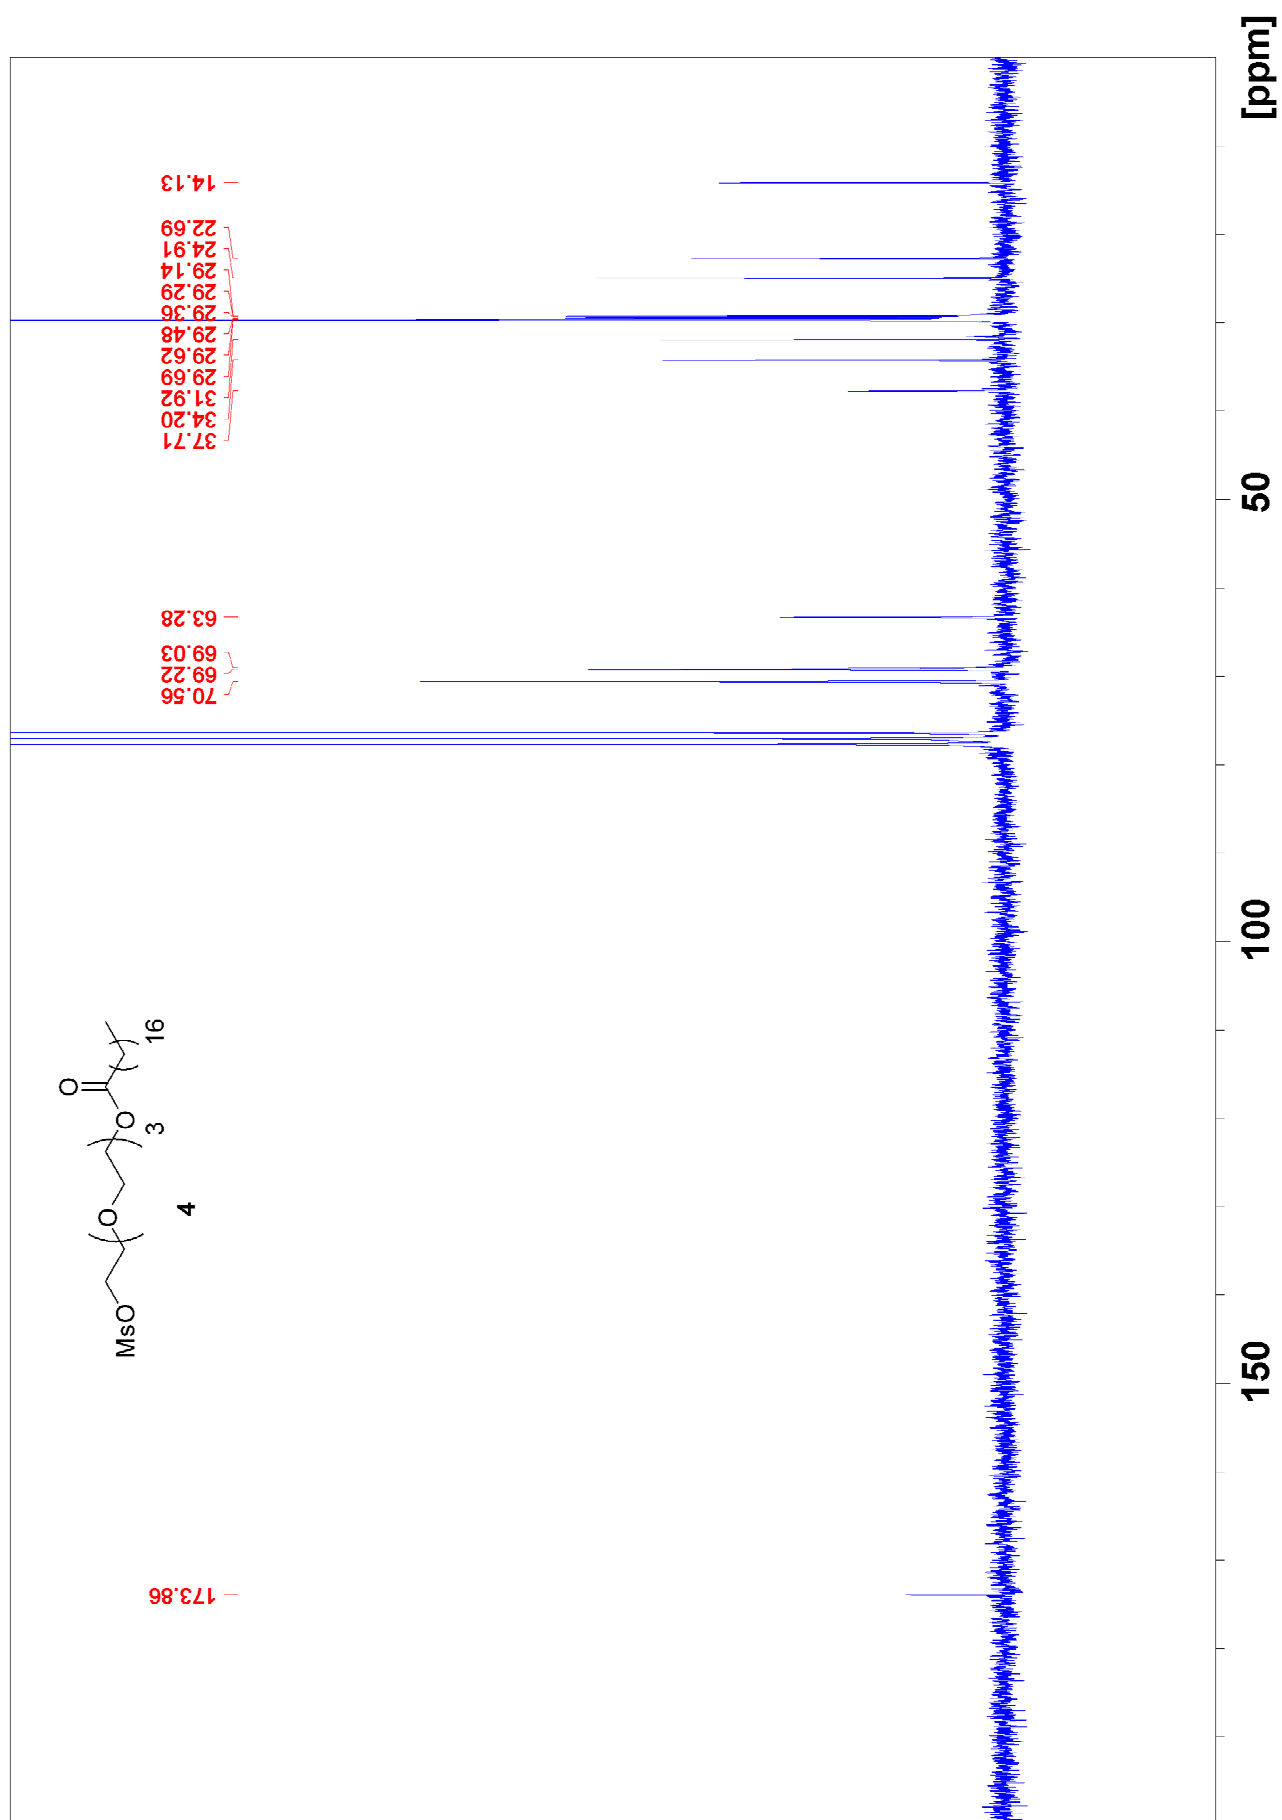

**Figure S4.** <sup>13</sup>C NMR spectrum of compound **4** (50 MHz, CDCl<sub>3</sub>).



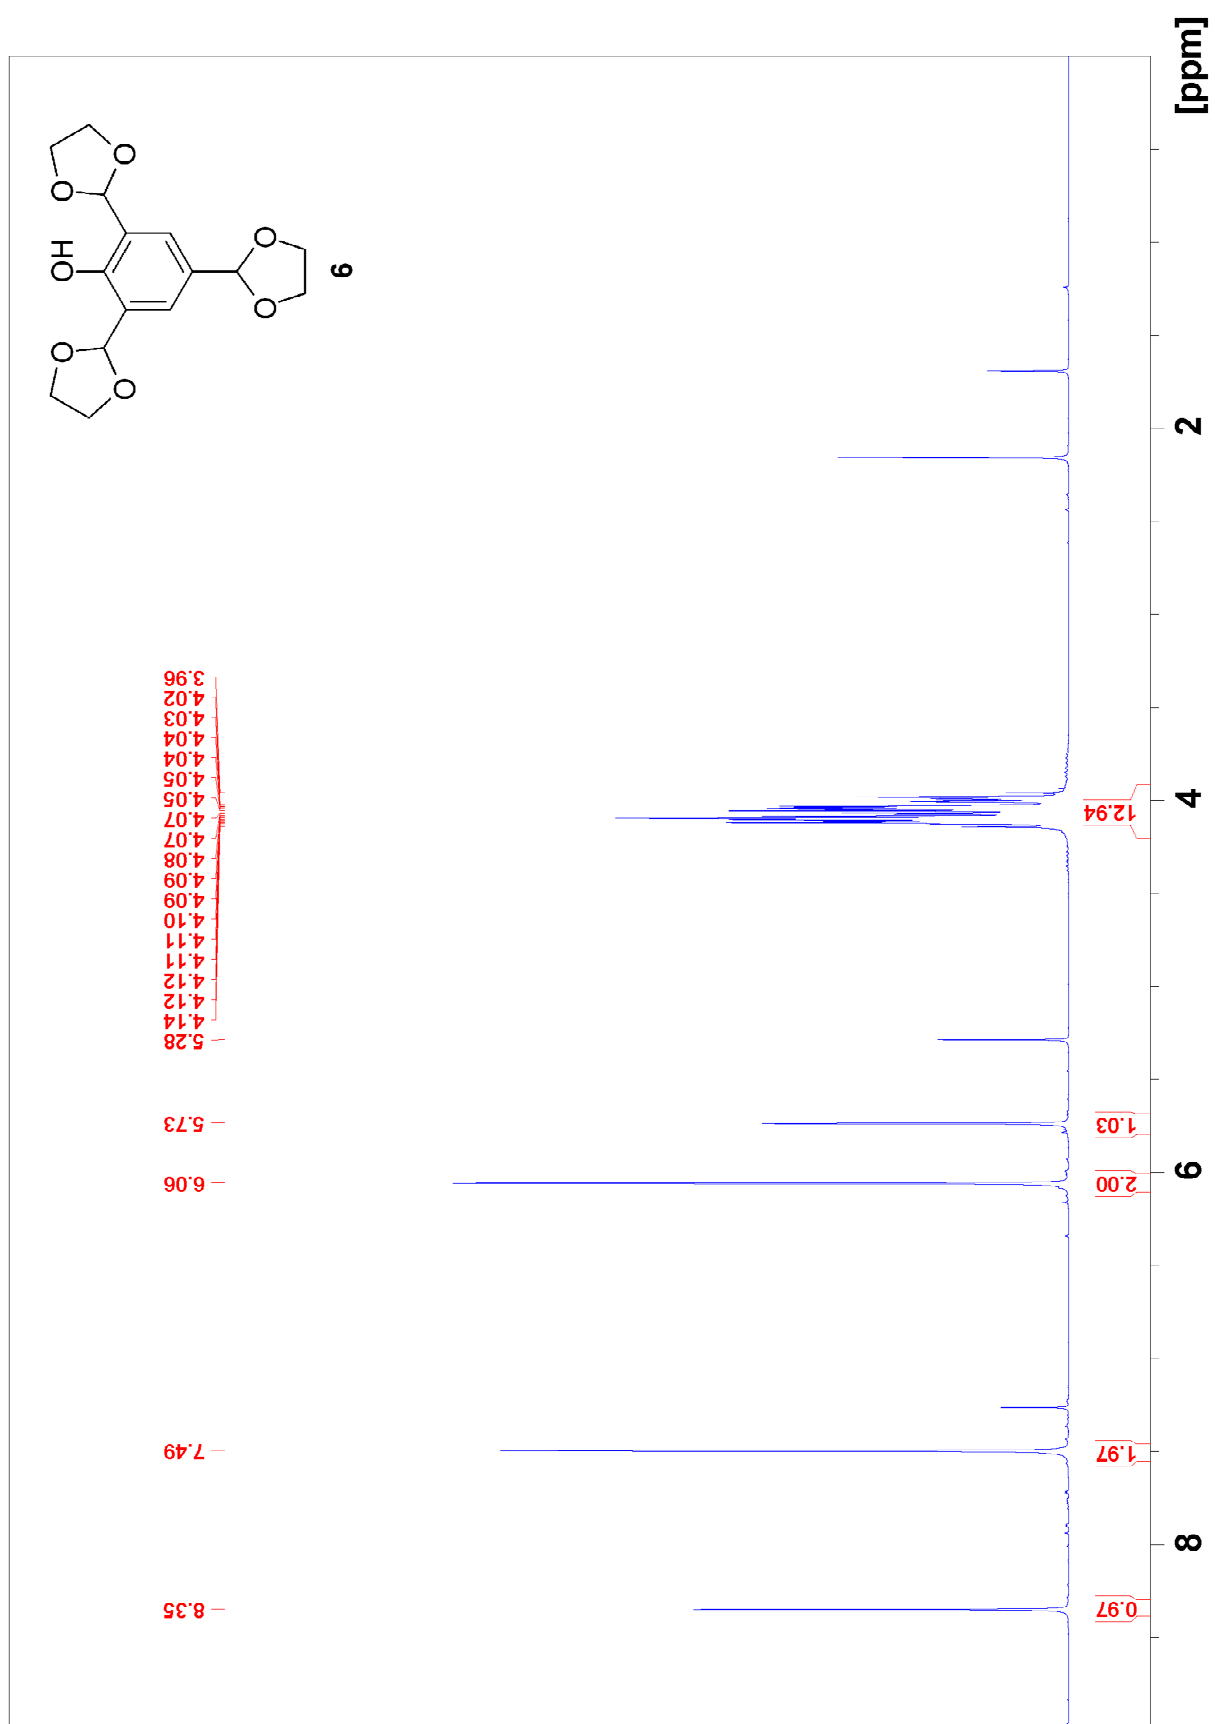

**Figure S5.** <sup>1</sup>H NMR spectrum of compound **6** (200 MHz, CDCl<sub>3</sub>).



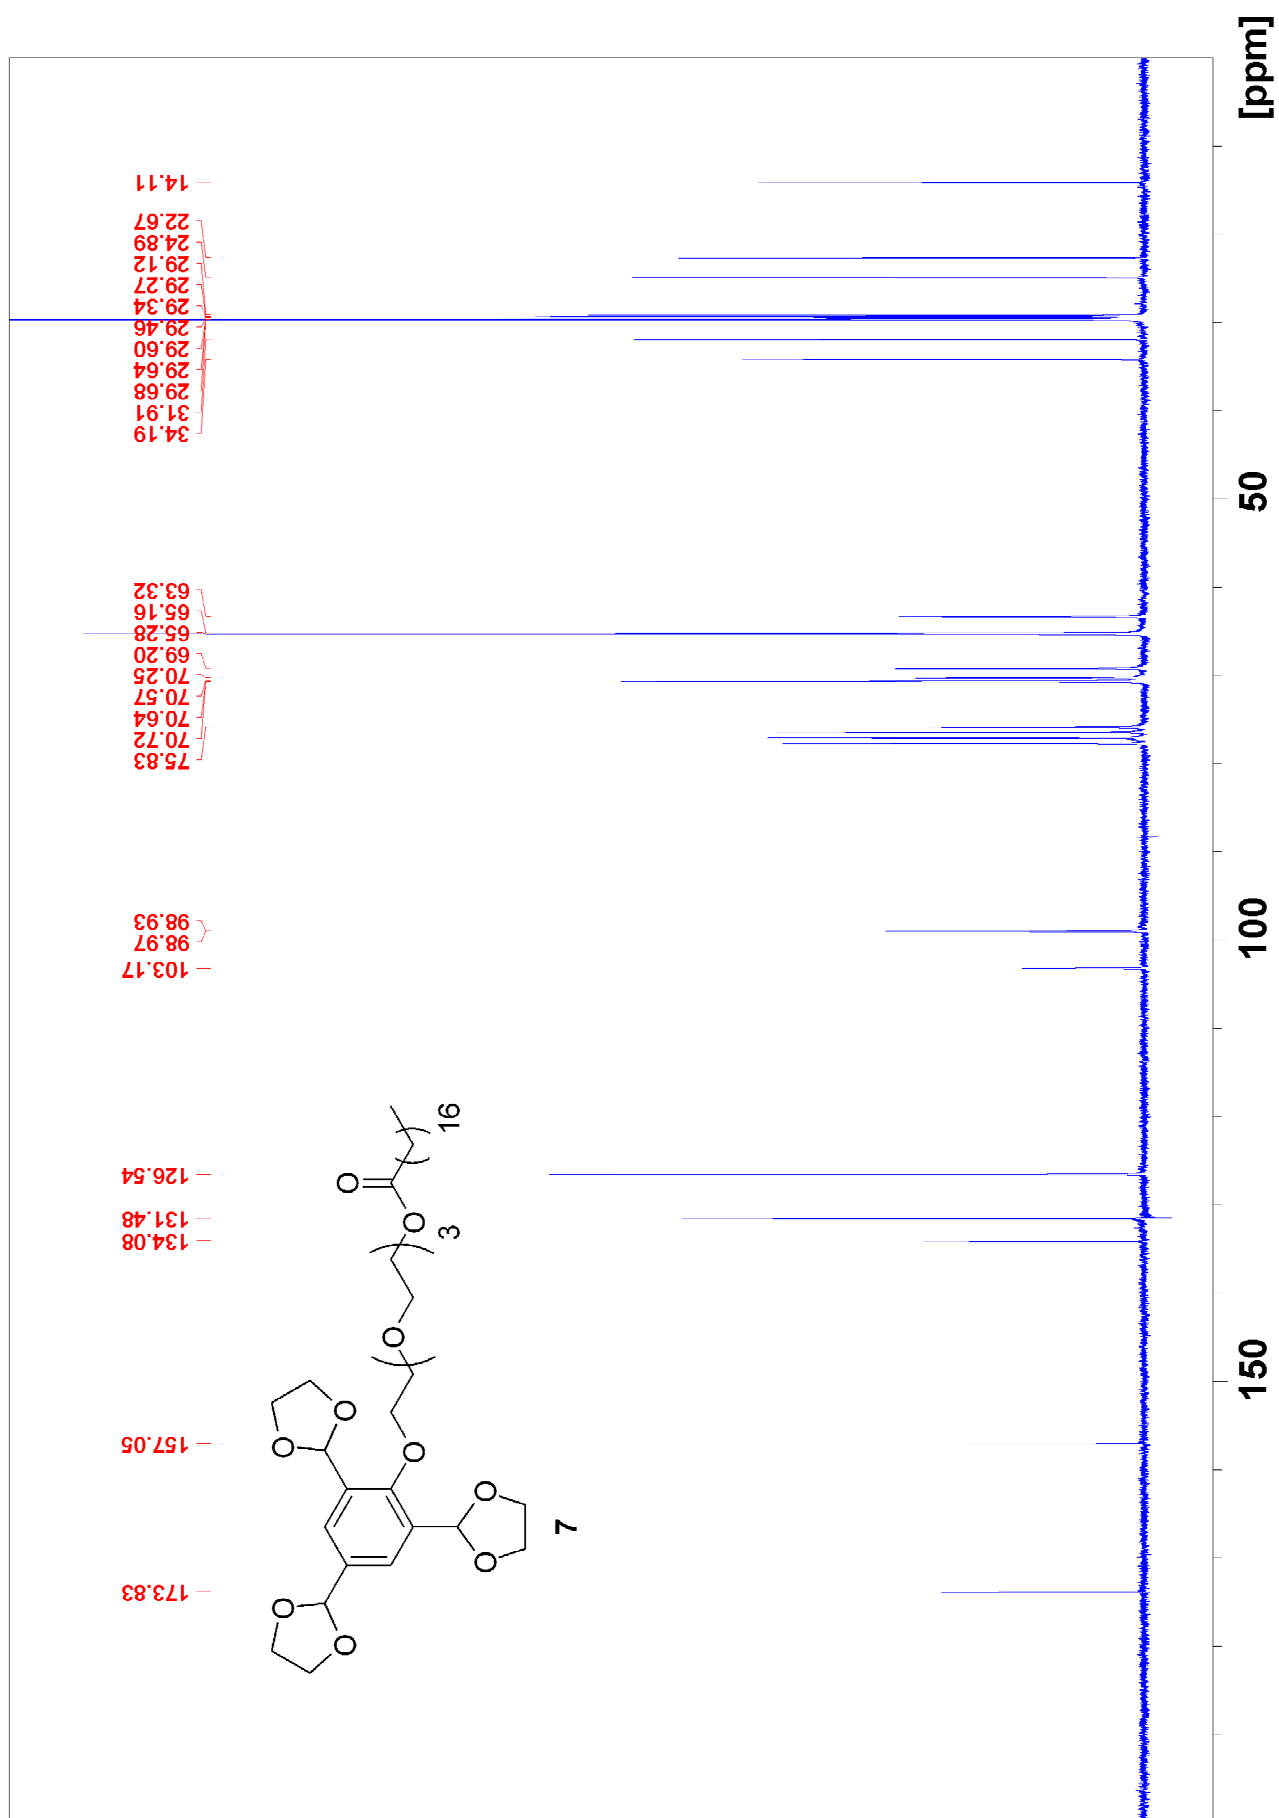

**Figure S7.** <sup>13</sup>C NMR spectrum of compound **7** (50 MHz, CDCl<sub>3</sub>).



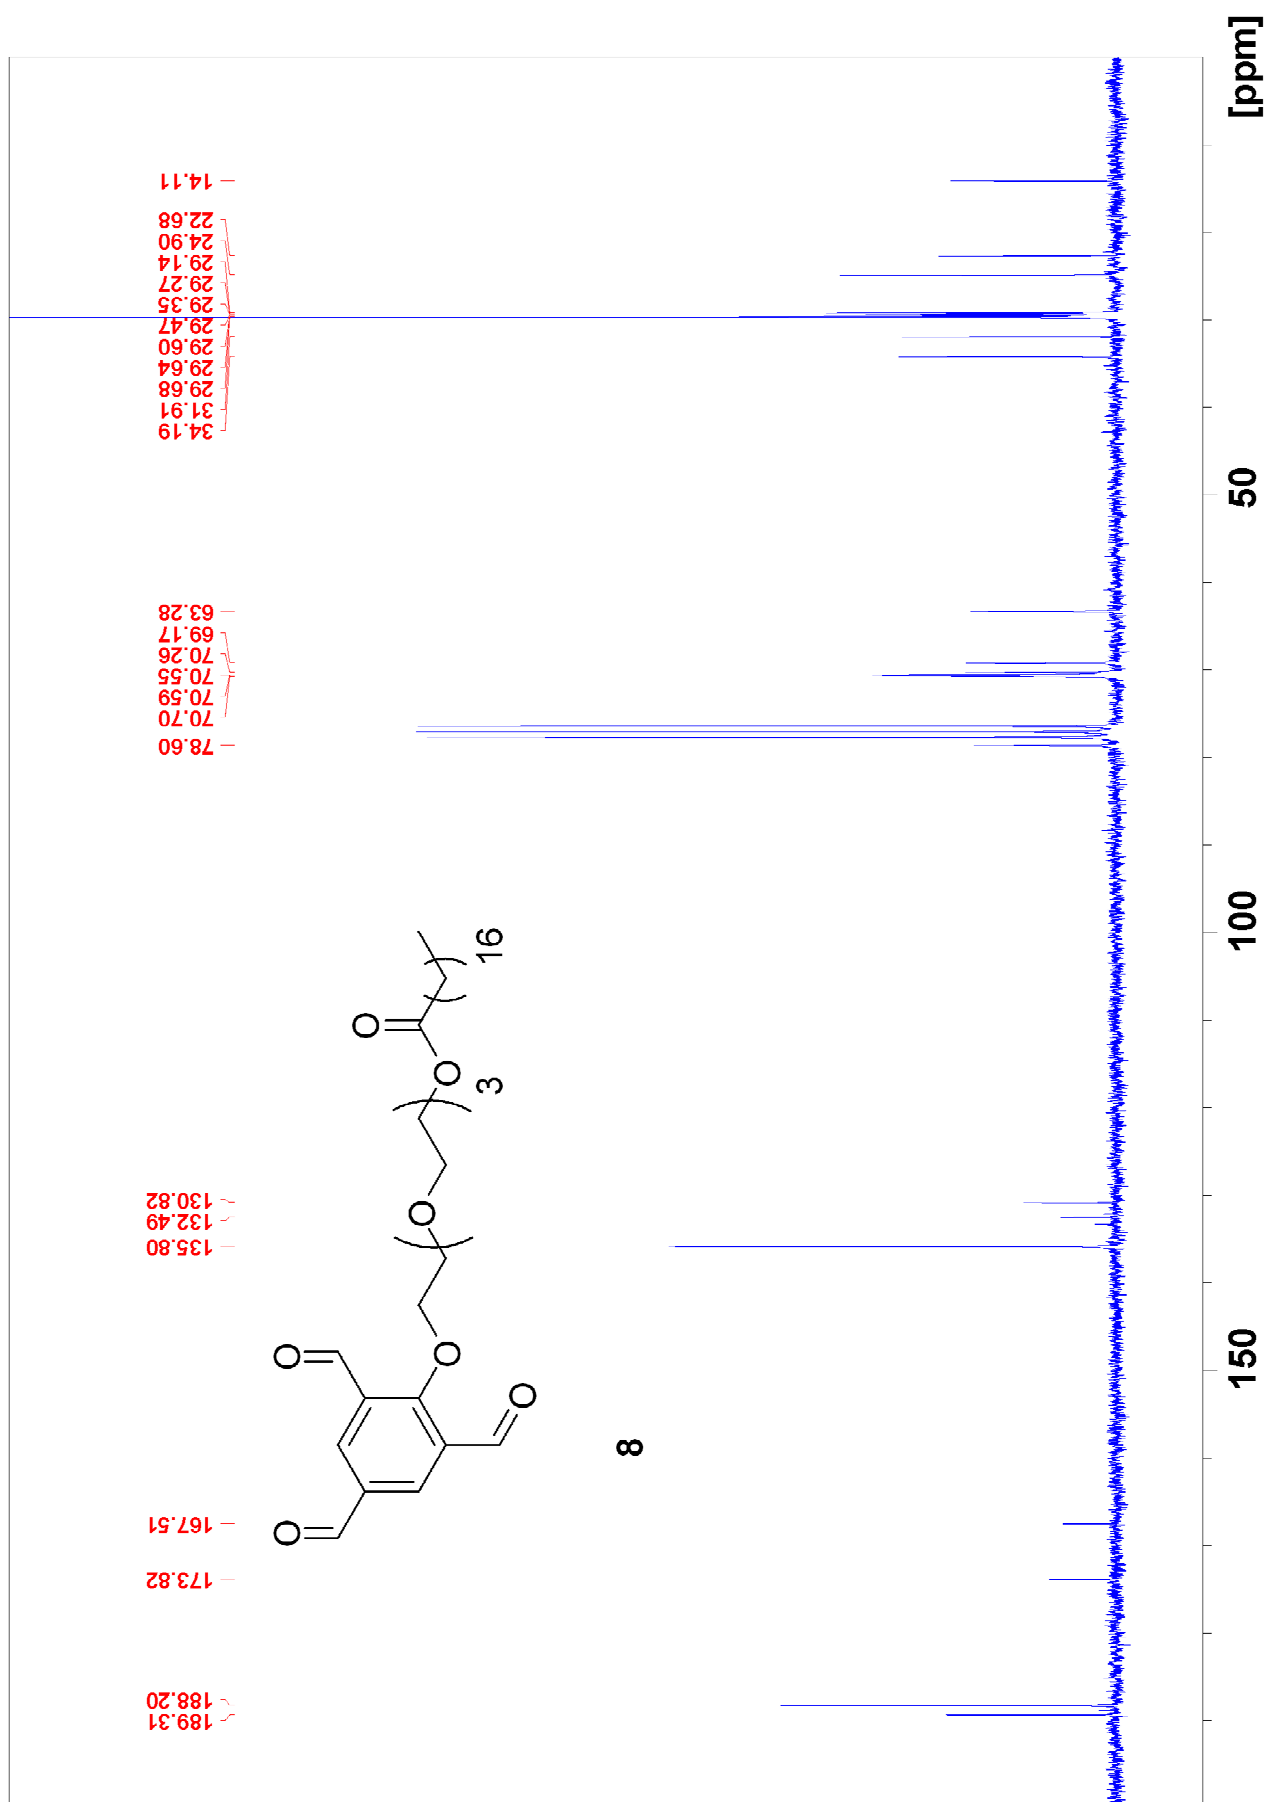

**Figure S9.** <sup>13</sup>C NMR spectrum of compound **8** (50 MHz, CDCl<sub>3</sub>).

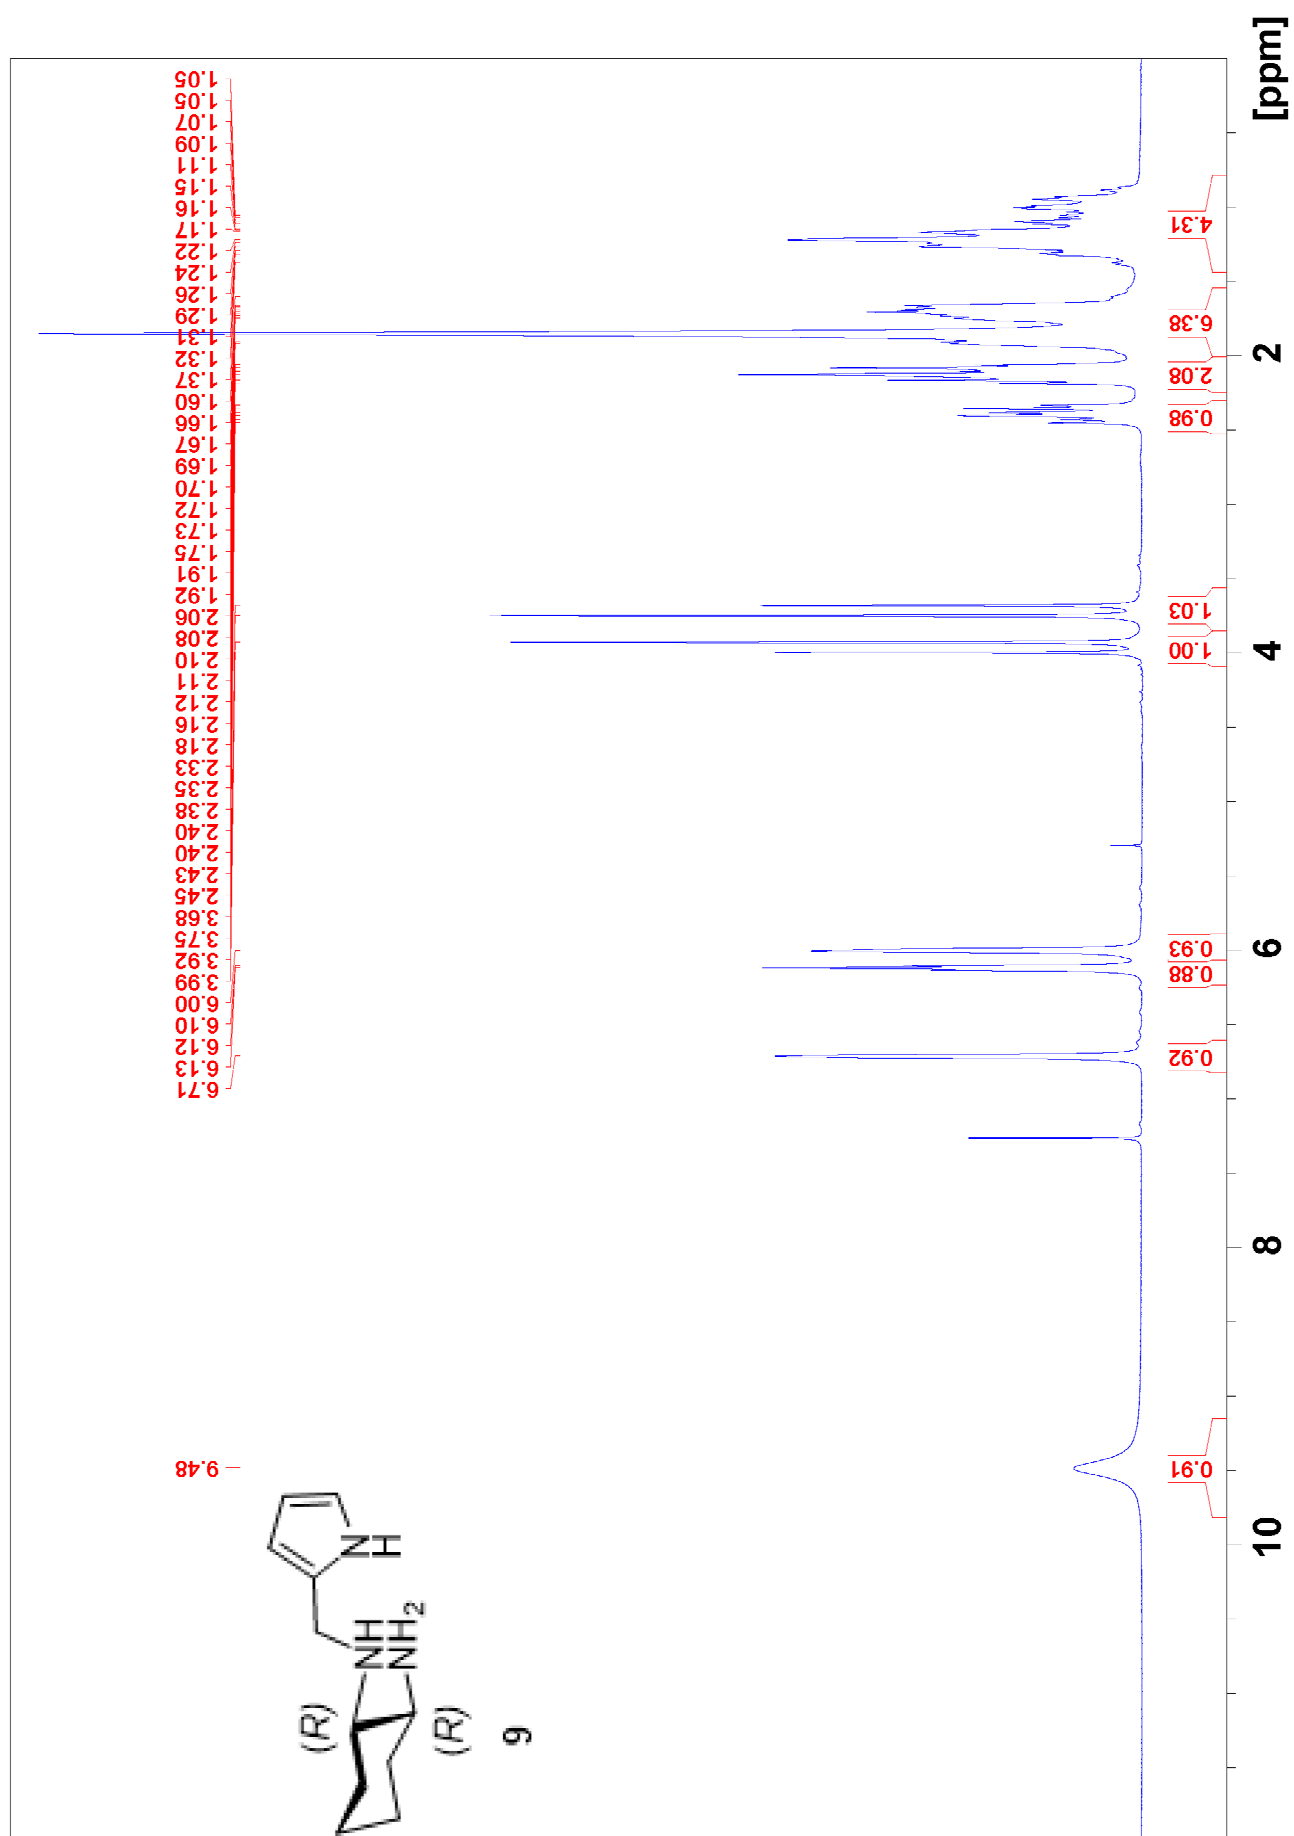

**Figure S10.** <sup>1</sup>H NMR spectrum of compound **9** (200 MHz, CDCl<sub>3</sub>).

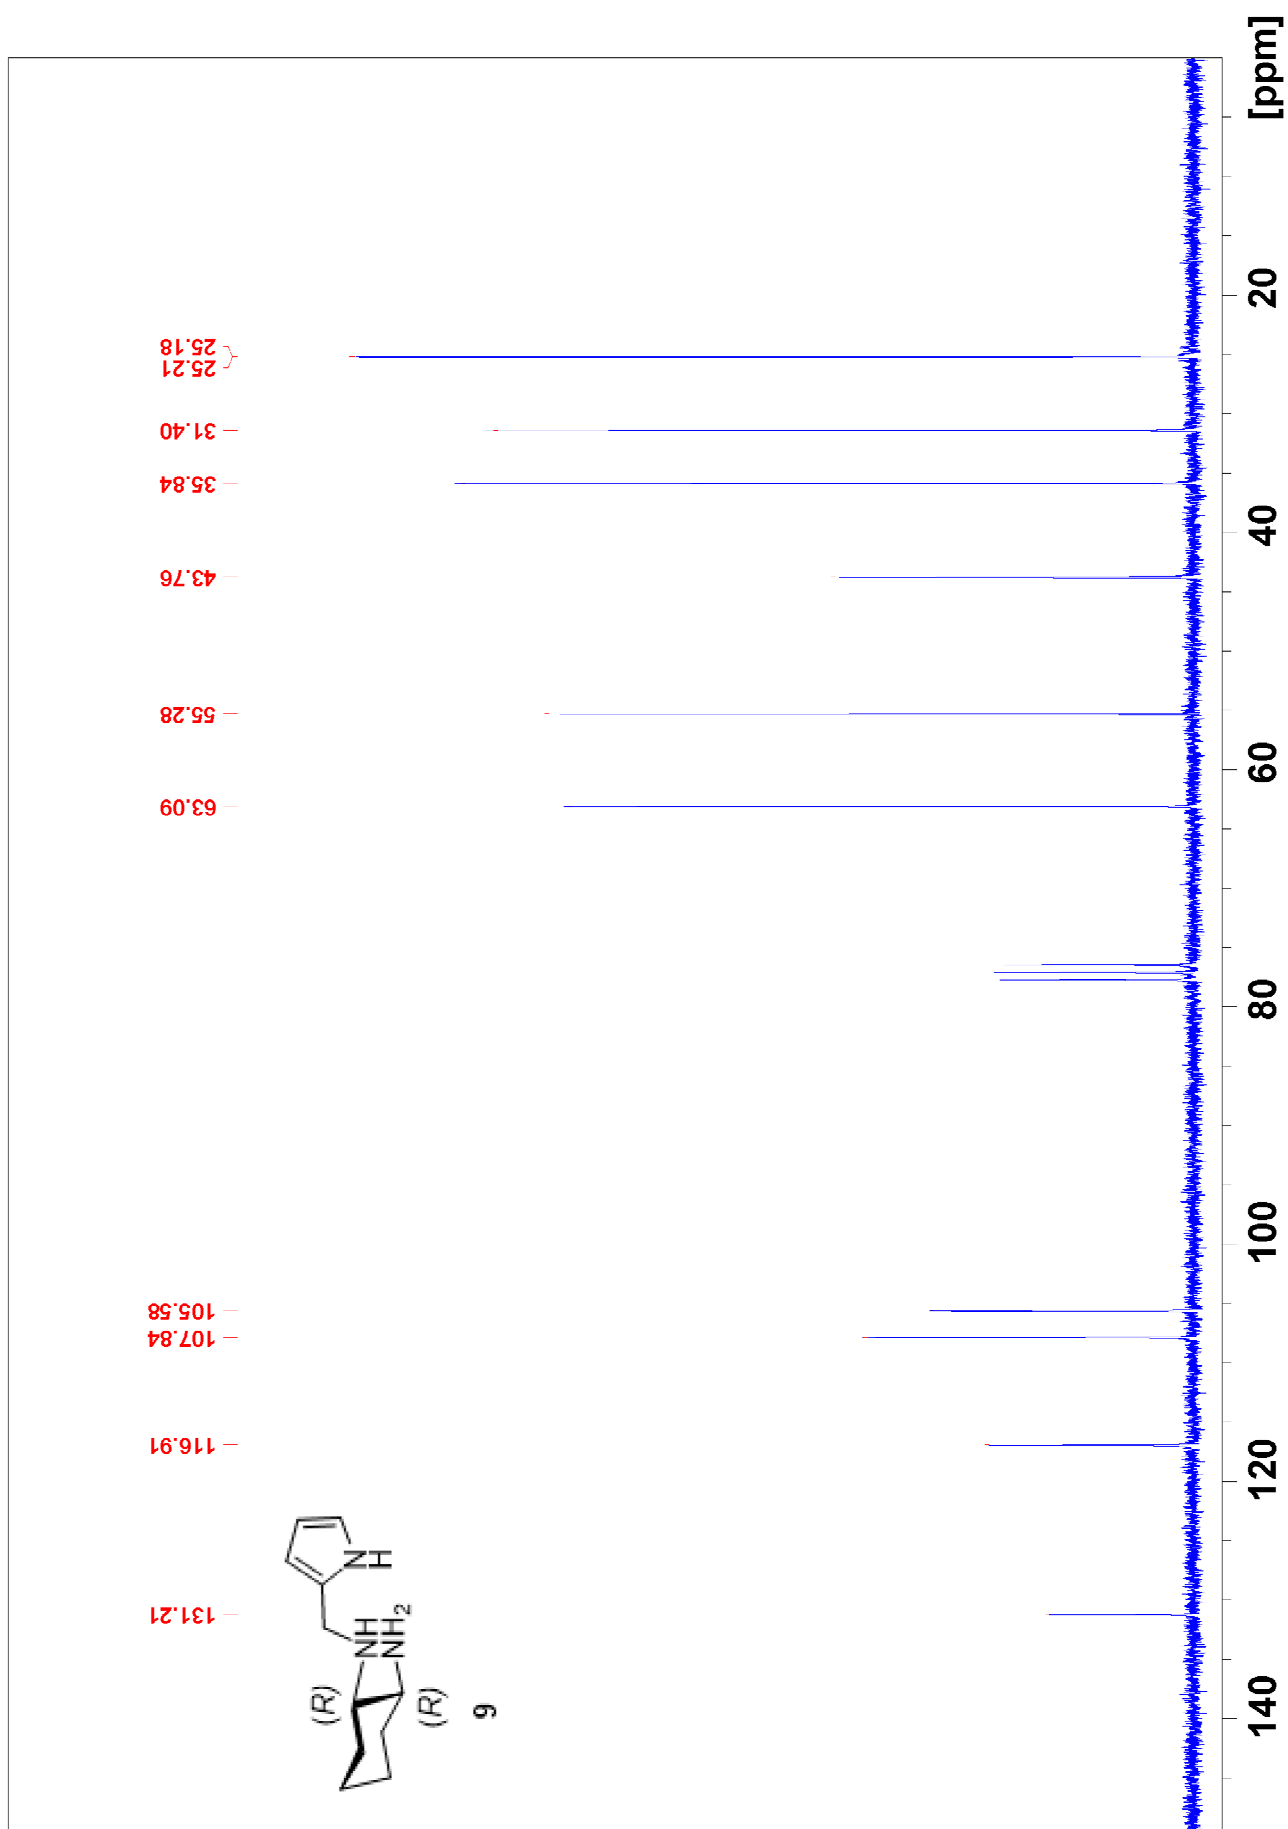

**Figure S11.** <sup>13</sup>C NMR spectrum of compound **9** (50 MHz, CDCl<sub>3</sub>).

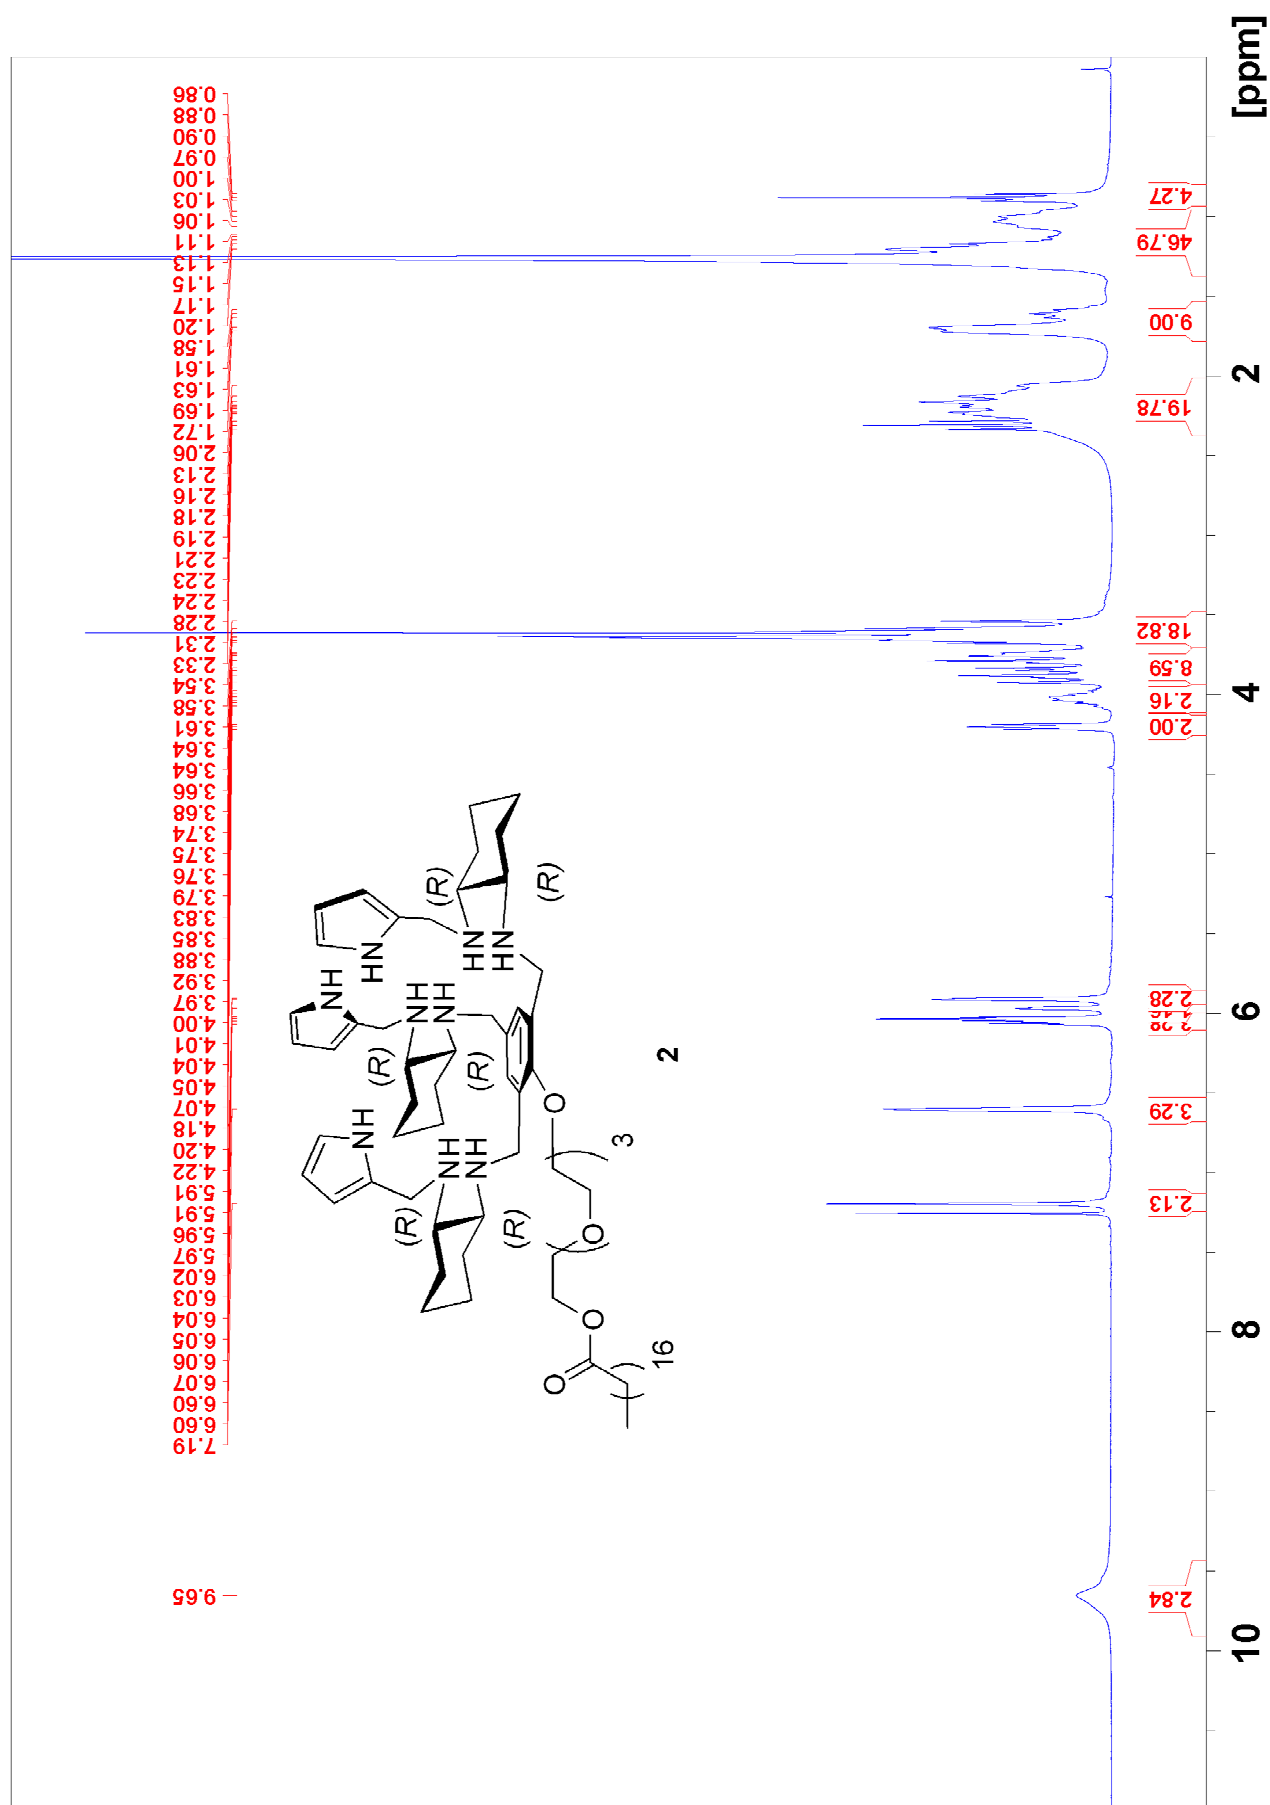

**Figure S12.** <sup>1</sup>H NMR spectrum of receptor **2** (300 MHz, CDCl<sub>3</sub>).



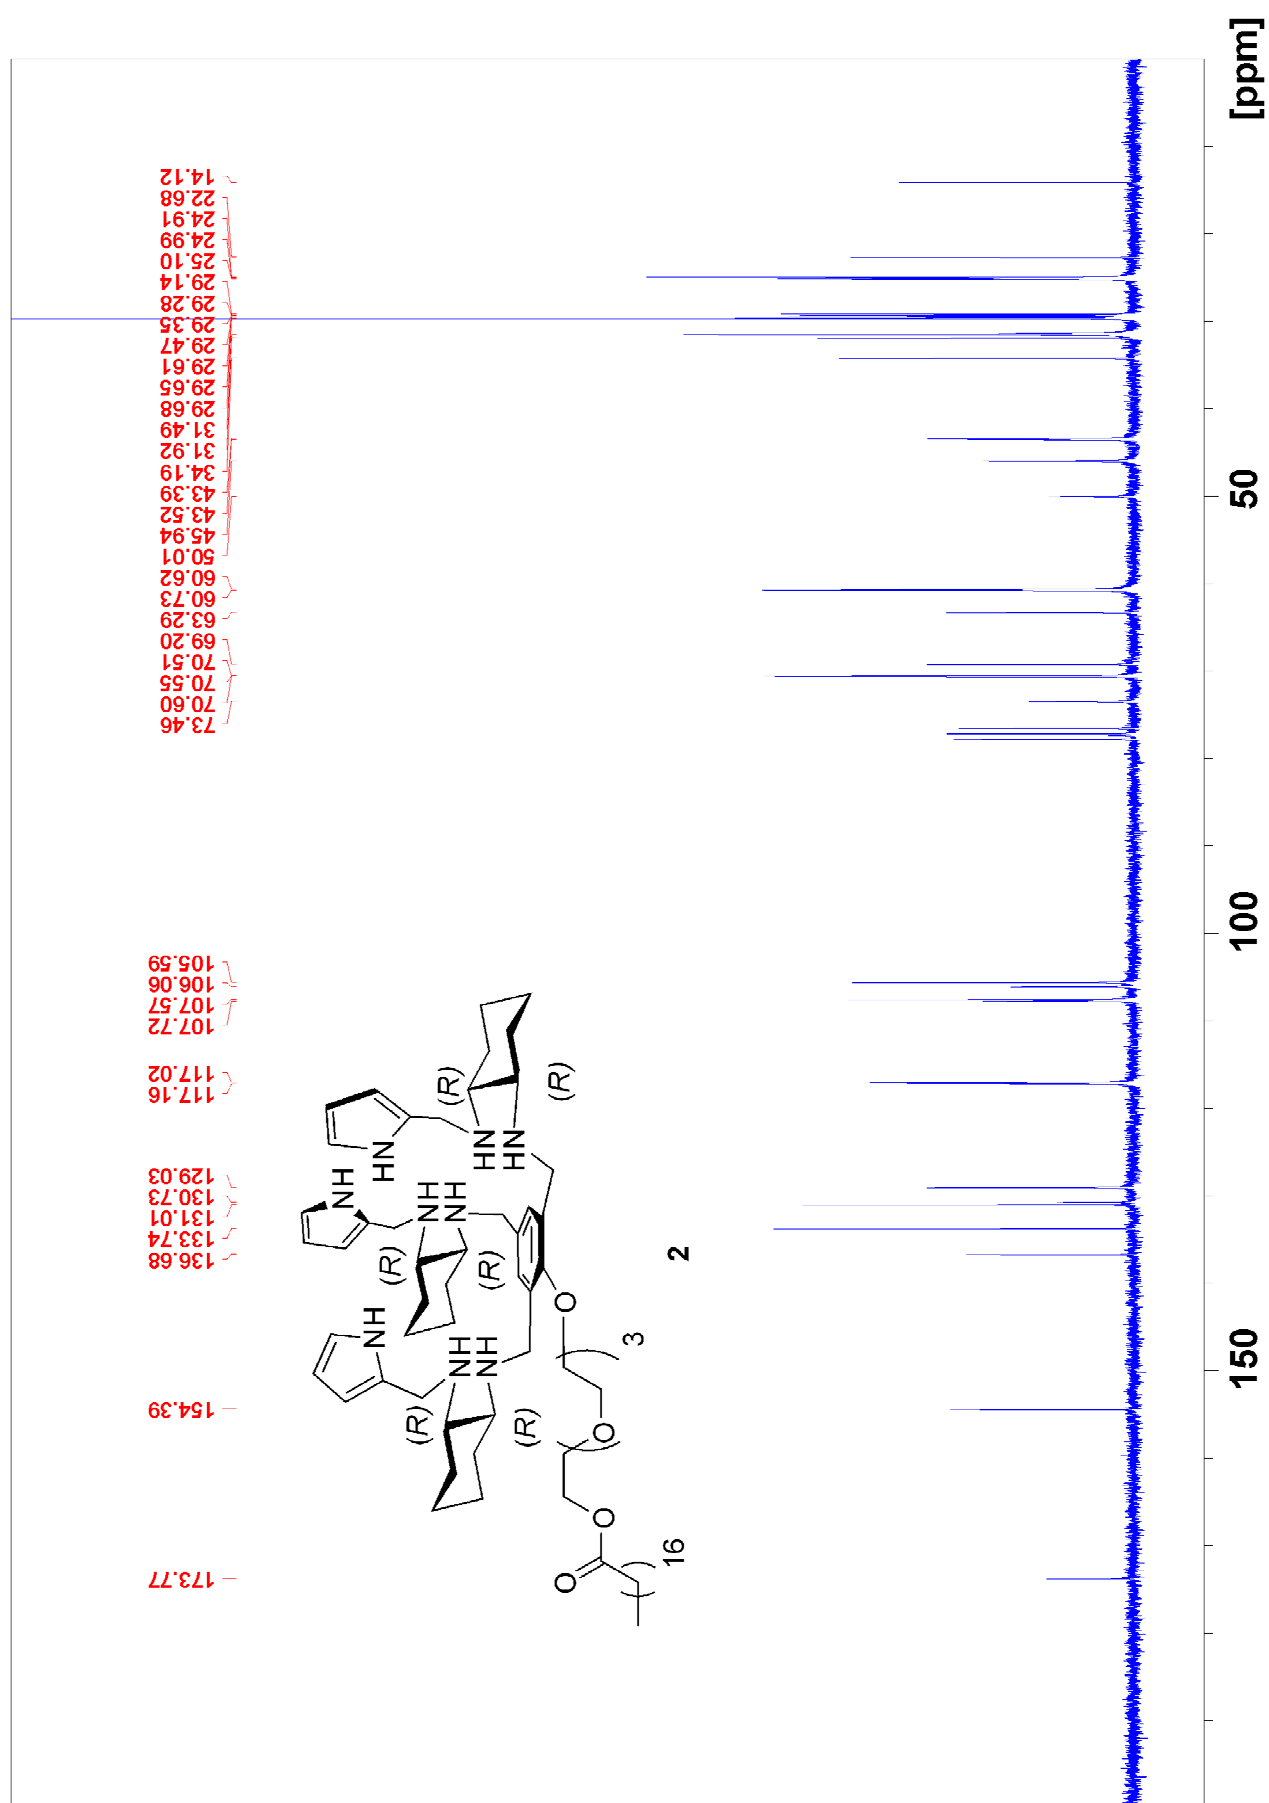

**Figure S13.** <sup>13</sup>C NMR spectrum of receptor **2** (75 MHz, CDCl<sub>3</sub>).

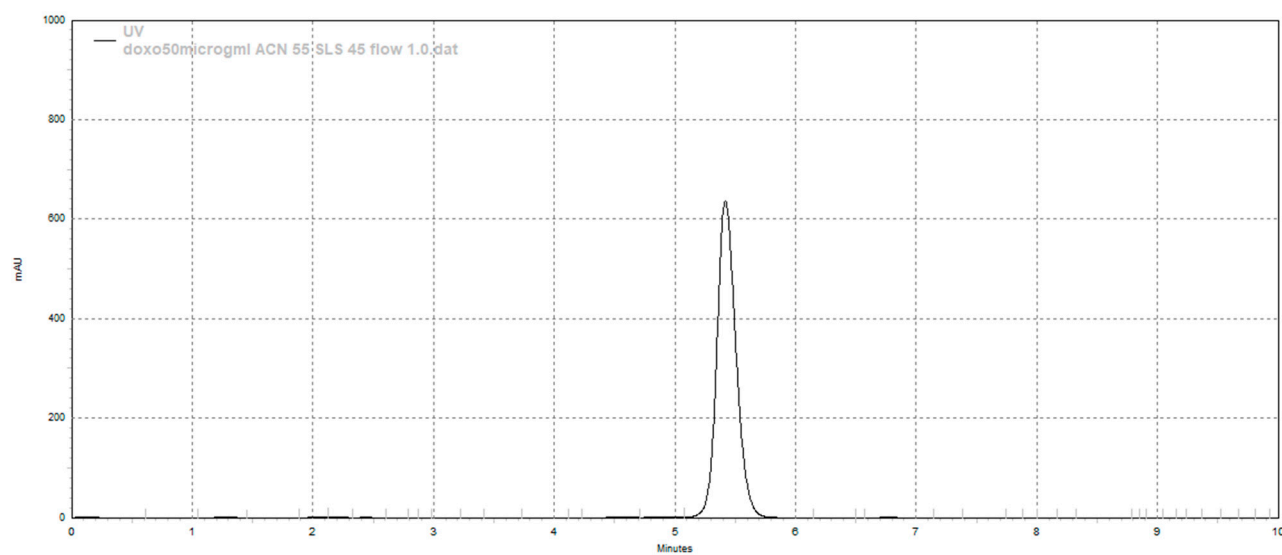

**Figure S14.** HPLC chromatogram of DOXO.
